# Supplementary material for: Vibrio parahaemolyticus RhsP represents a widespread group of pro-effectors for type VI secretion systems
Source: PubMed Central journal article supplement (PMC6156420; doi:10.1038/s41467-018-06201-5), 2018-09-25
Supplement: 41467_2018_6201_MOESM2_ESM.pdf [file 41467_2018_6201_MOESM2_ESM.pdf]

## **Description of Additional Supplementary Files**

File Name: Supplementary Data 1

Description: Pro-effectors are widespread among different bacterial species.
